# Supplementary material for: Genome Analysis of Multidrug-Resistant Shewanella algae Isolated From Human Soft Tissue Sample
Source: PubMed Central journal article supplement (PMC5932639; doi:10.3389/fphar.2018.00419), 2018-04-26
Supplement: Image_3.pdf [file Image_3.pdf]

Supplementary Figure S3. Average Nucleotide Identity (ANI) values of the *S. algae* YHL

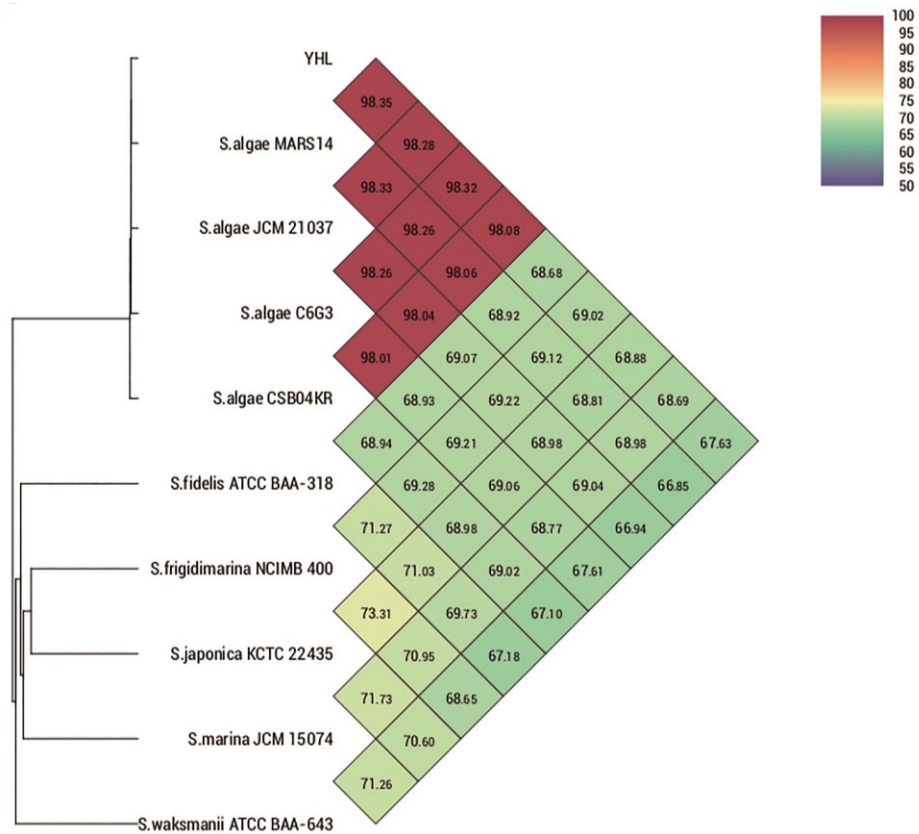

(A) The distribution between specific-CDS and shared-CDS of the *S. algae* (B) The EggNOG classification of YHL-specific CDS

The Venn diagram showing of the number between specific-CDS and shared-CDS in the *S. algae* , and the statistics specific gene of the *S. algae* YHL strain

(C) Average Nucleotide Identity (ANI) values in the *S. algae* genome

OAT[1] uses OrthoANI to measure the overall similarity between *Shewanella* genome sequences.

[1] Lee, I., Kim, Y. O., Park, S. C., & Chun, J. (2015). OrthoANI: An improved algorithm and software for calculating average nucleotide identity. *Int J Syst Evol Microbiol.* 66: 1100-1103.
